# Supplementary material for: Oncogenic features of neuromedin U in breast cancer are associated with NMUR2 expression involving crosstalk with members of the WNT signaling pathway
Source: PubMed Central journal article supplement (PMC5482652; doi:10.18632/oncotarget.16121), 2017-03-11
Supplement: oncotarget-08-36246-s001.pdf [file oncotarget-08-36246-s001.pdf]

## Oncogenic features of neuromedin U in breast cancer are associated with NMUR2 expression involving crosstalk with members of the WNT signaling pathway

### SUPPLEMENTARY FILES

Supplementary File 1: Clinico-pathological parameters of 62 breast cancer specimens analyzed in this study

| Parameter                             | Categorization                     | n <sup>a</sup> analyzable | %    |
|---------------------------------------|------------------------------------|---------------------------|------|
| Age at diagnosis:                     | median 63.5 years<br>(range 33-84) |                           |      |
|                                       | <63.5 years                        | 31                        | 50.0 |
|                                       | ≥63.5 years                        | 31                        | 50.0 |
| Tumor size <sup>b</sup>               | pT1                                | 35                        | 56.5 |
|                                       | pT2                                | 25                        | 40.3 |
|                                       | pT3                                | 2                         | 3.2  |
|                                       | pT4                                | 0                         | 0    |
|                                       |                                    |                           |      |
| Lymph node status <sup>b</sup>        | pN0                                | 34                        | 54.8 |
|                                       | pN1-3                              | 27                        | 43.6 |
|                                       | unknown                            | 1                         | 1.6  |
| Histological tumor grade <sup>c</sup> | G1                                 | 2                         | 3.2  |
|                                       | G2                                 | 21                        | 33.9 |
|                                       | G3                                 | 38                        | 61.3 |
|                                       | unknown                            | 1                         | 1.6  |
|                                       |                                    |                           |      |
| Histological type                     | invasive ductal                    | 55                        | 88.7 |
|                                       | invasive lobular                   | 5                         | 8.1  |
|                                       | other                              | 2                         | 3.2  |
| Estrogen receptor status              | negative (IRS <sup>d</sup> 0-2)    | 18                        | 29.0 |
|                                       | positive (IRS <sup>d</sup> 3-12)   | 42                        | 67.7 |
|                                       | unknown                            | 2                         | 3.2  |
| Progesterone receptor status          | negative (IRS <sup>d</sup> 0-2)    | 20                        | 32.3 |
|                                       | positive (IRS <sup>d</sup> 3-12)   | 39                        | 62.9 |
|                                       | unknown                            | 3                         | 4.8  |
| HER2 status <sup>e</sup>              | negative                           | 53                        | 85.5 |
|                                       | positive                           | 8                         | 12.9 |
|                                       | unknown                            | 1                         | 1.6  |

<sup>a</sup>Only female patients with primary, unilateral, invasive breast cancer were included. <sup>b</sup>According to TNM classification by Sobin and Wittekind [52]. <sup>c</sup>According to Bloom and Richardson, as modified by Elston and Ellis [53]. <sup>d</sup>Immunoreactive score (IRS) according to Remmele and Stegner [54]. <sup>e</sup>Overexpression of the *ERBB2* gene (*HER2/neu*) was diagnosed analogously to the threshold of the DAKO-Score system based on IHC assay. Uncertain cases were additionally validated by FISH assay. Percentages may not sum-up to 100% due to rounding.

**A**

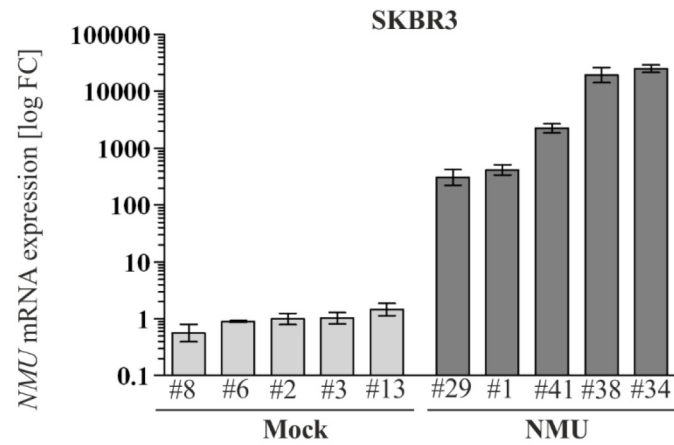

**B**

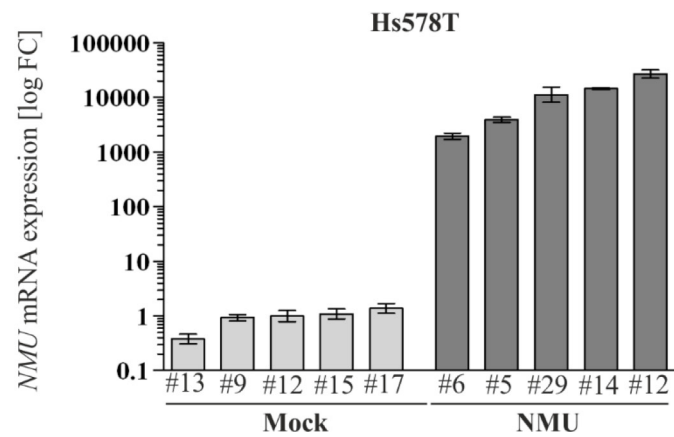

**Supplementary File 2: *NMU* mRNA expression in stable single-cell clones.** Real-time PCR-based *NMU* expression analysis in independent stably transfected NMU (n=5) and mock clones (n=5) of the (A) SKBR3 and (B) Hs578T gain-of-function *in vitro* model.

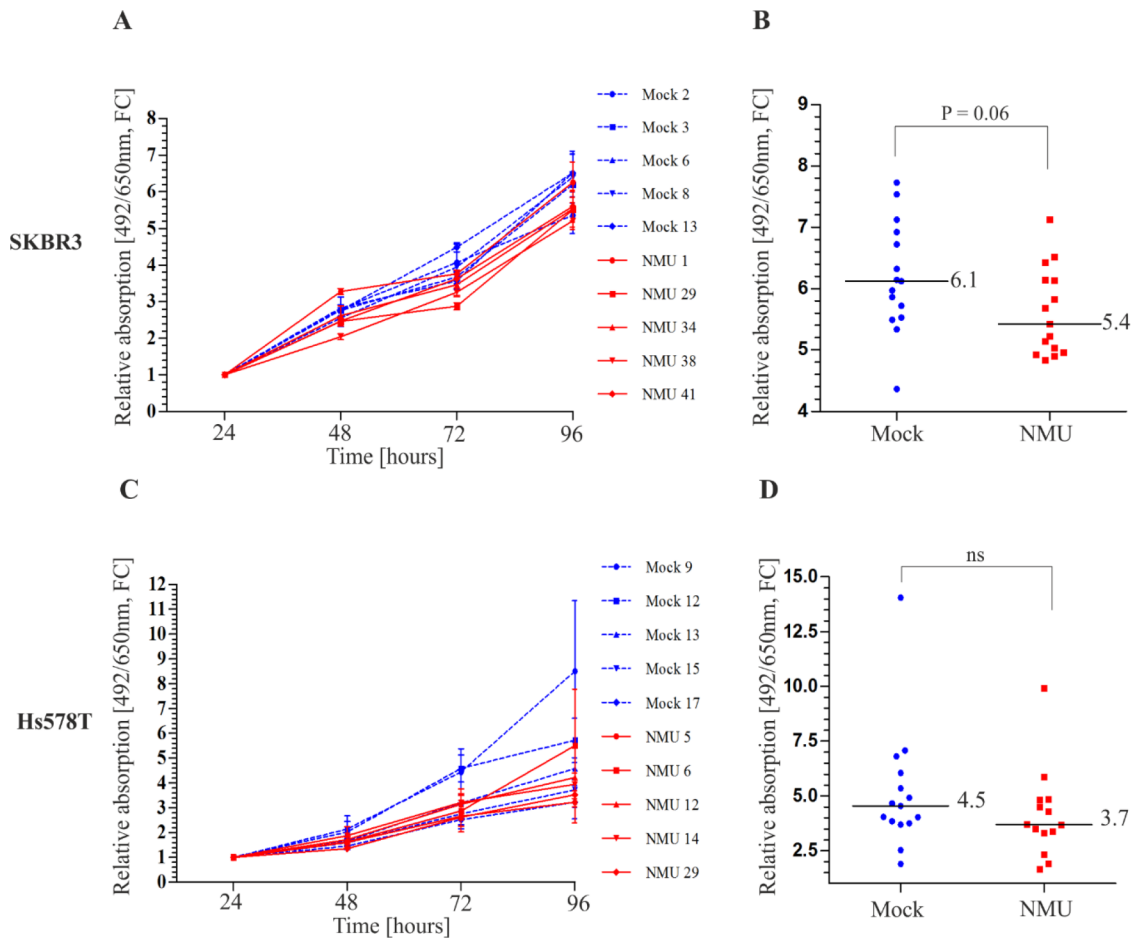

**Supplementary File 3: XTT cell viability assay.** Cell viability of independent NMU (n=5) and empty vector (n=5) clones of both *in vitro* models (SKBR3 and Hs578T) was determined colorimetrically (absorbance at 492/650nm) at four different time points: 24, 48, 72 and 96 h after cell seeding (A and C). The baseline level at 24 h for each clone was set to 1. Experiments were performed in triplicate. Vertical lines: ± standard error of margin (SEM). Scatter plots showing the triplicate cell viability measurements for each clone at 96h (B and D). Horizontal lines: grouped medians. Ns: not significant (Mann-Whitney-U test).

**Supplementary File 4:**

See Supplementary File 4

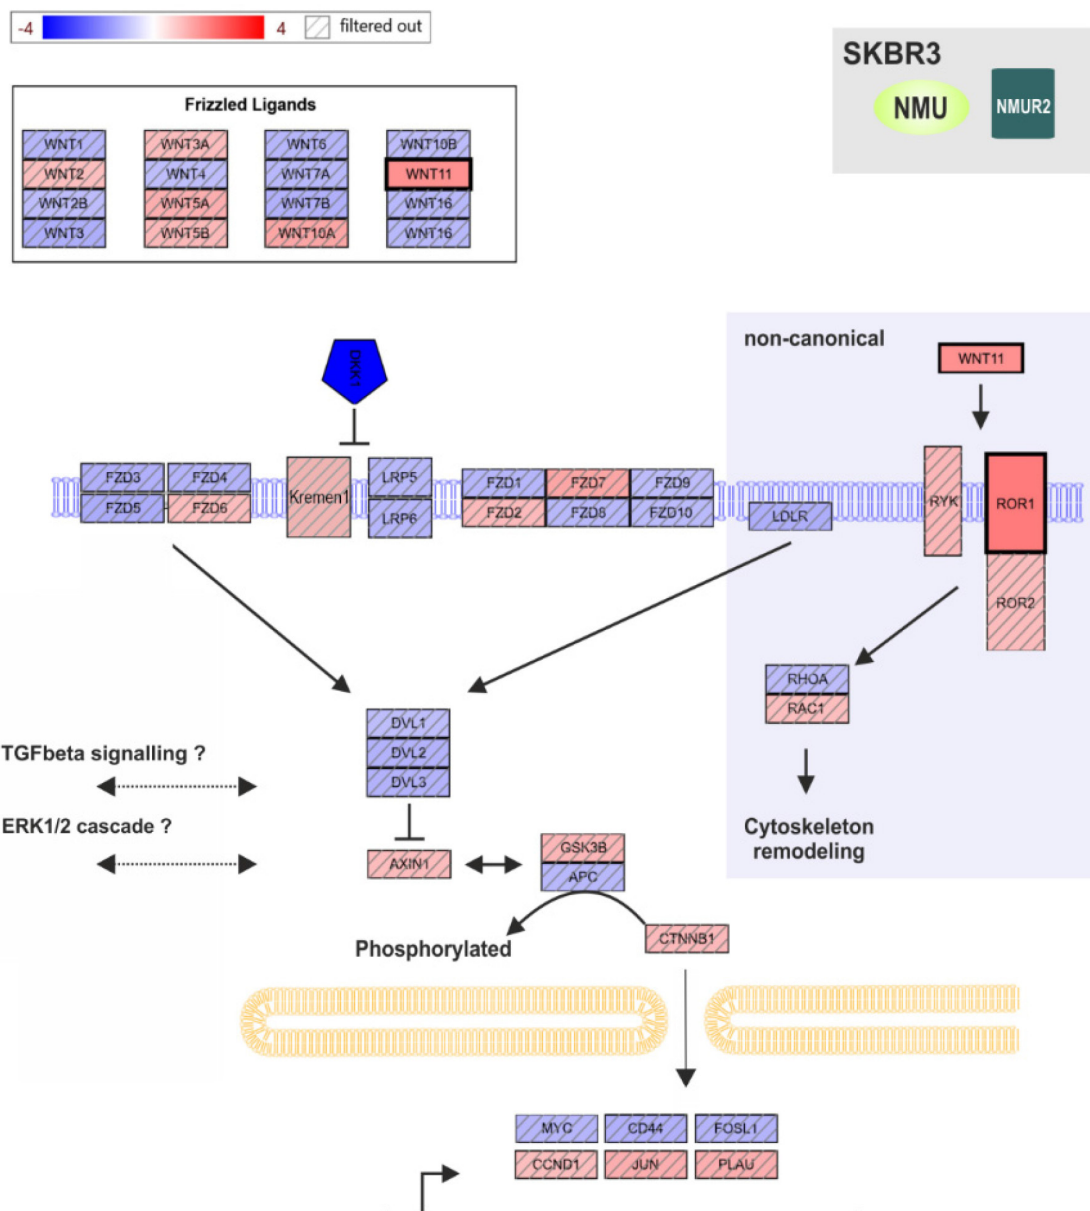

**Supplementary File 5: NMU signaling modulates the WNT receptor signaling pathway in NMUR2-positive SKBR3 breast cancer cells.** Simplified illustration of canonical and non-canonical WNT signaling components analyzed in SKBR3 NMU (n=3) and SKBR3 mock clones (n=3) by microarray analysis. Blue color: gene expression down-regulated, white color: expression not affected, red color: gene expression up-regulated in SKBR3 NMU clones compared to SKBR3 mock clones. Gene expression differences were considered significant if transcript levels between test (NMU) and control (mock) group were differential with a minimal change in expression by 1.5-fold and a raw *P* value < 0.05. Genes depicted in a hatched fashion did not meet the filtering parameters. Potential crosstalk between WNT and other signaling cascades modulated by NMU over-expression is indicated by dashed arrows.

**Supplementary File 6: TCGA breast cancer sample ID**

See Supplementary File 6

## Supplementary File 7: Primer sequences and PCR conditions for RNA expression analyses

| Primer                | Sequence                       | Product size [bp] |
|-----------------------|--------------------------------|-------------------|
| <i>CD44</i> forward   | 5'- GCATCGGATTTGAGACCTGC -3'   | 125               |
| <i>CD44</i> reverse   | 5'- GGAGGTGTTGGATGTGAGGA -3'   |                   |
| <i>MYC</i> forward    | 5'- ATTCTCTGCTCTCCTCGACG -3'   | 155               |
| <i>MYC</i> reverse    | 5'- AGCCTGCCTCTTTTCCACA -3'    |                   |
| <i>DKK1</i> forward   | 5'- CCCCAGGAATTACTGCAAAA -3'   | 142               |
| <i>DKK1</i> reverse   | 5'- AGACAAGGTGGTTCTTCTGGA -3'  |                   |
| <i>FZD3</i> forward   | 5'-CTTTGTGCACTCTACGCTCC-3'     | 123               |
| <i>FZD3</i> reverse   | 5'-GGCCAAGGAACACCAAACAT-3'     |                   |
| <i>GAPDH</i> forward  | 5'-GAAGGTGAAGTCCGGAGTCA-3'     | 289               |
| <i>GAPDH</i> reverse  | 5'-TGGACTCCACGACGTAATCA-3'     |                   |
| <i>GHSR1a</i> forward | 5'- ACCAGAACCACAAGCAAACC -3'   | 141               |
| <i>GHSR1a</i> reverse | 5'- GGCTGATCTGAGCAATCTCC -3'   |                   |
| <i>GHSR1b</i> forward | 5'- CTTGGGACACCAACGAGTG -3'    | 263               |
| <i>GHSR1b</i> reverse | 5'- AGGACCCGCGAGAGAAAGC -3'    |                   |
| <i>LRP5</i> forward   | 5'-AAGCTGTGAATGTGGCCAAG-3'     | 152               |
| <i>LRP5</i> reverse   | 5'-CACGATGCAGGTCTTCATGT-3'     |                   |
| <i>LRP6</i> forward   | 5'-GCATGTGATTGGCTTGGAGA-3'     | 176               |
| <i>LRP6</i> reverse   | 5'-TCTCCCCAGTCTGTCCAGTA-3'     |                   |
| <i>NMU</i> forward    | 5'- GGATTACAGCCTGAACAACAGC -3' | 143               |
| <i>NMU</i> reverse    | 5'- GGCTTTGGTAGCATTCCCATA -3'  |                   |
| <i>NMUR1</i> forward  | 5'- CAGCCAGGTCCAGATACACC -3'   | 164               |
| <i>NMUR1</i> reverse  | 5'- CAGGCCATCTGTCCACTGT -3'    |                   |
| <i>NMUR2</i> forward  | 5'- CATCATCCAGGTCACCTCCT -3'   | 120               |
| <i>NMUR2</i> reverse  | 5' TTCCCTTCATCTGCCTCAAG -3'    |                   |
| <i>NTSR1</i> forward  | 5'- ACCGTCAAGTTCGTCATACA -3'   | 170               |
| <i>NTSR1</i> reverse  | 5'- ATGCTGAATGTGCTGTGCTC -3'   |                   |
| <i>ROR1</i> forward   | 5'-AGCCATACAGAGGGATTGCA-3'     | 167               |
| <i>ROR1</i> reverse   | 5'-GGAAGGAATGGCGAACTGAG-3'     |                   |
| <i>WNT11</i> forward  | 5'- CGTGTGCTATGGCATCAAGT -3'   | 144               |
| <i>WNT11</i> reverse  | 5'- GTGTGCATGAGCTCCAGGT -3'    |                   |

**Real-time PCR reaction volumes of 20 µl consisted of the following components:**

5 µM forward primer, 5 µM reverse primer, 10 µl SYBR GRN Supermix and 1 µl of cDNA as PCR template. Cycle conditions: 95°C for 3 min, 40 cycles of 95°C for 30 s, 60°C for 20 s, 72°C for 30 s. bp: base pairs.
